# Supplementary material for: Complete Genome Sequence of Pseudomonas psychrotolerans CS51, a Plant Growth-Promoting Bacterium, Under Heavy Metal Stress Conditions
Source: MDPI journal article supplement (doi:10.3390/microorganisms8030382), 2020-03-09
Supplement: s1 [file s1]

## Supplementary Data

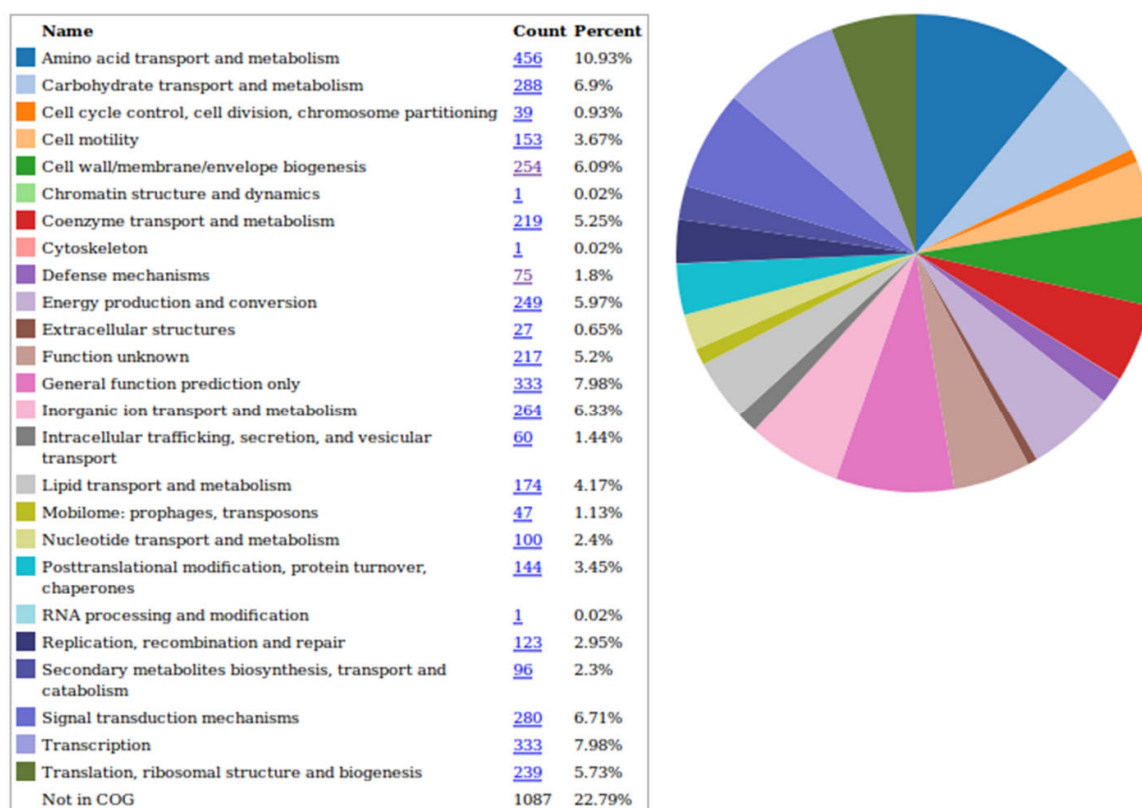

**Figure S1.** Genes (number and percentage) in the CS51 genome related to COG categories.

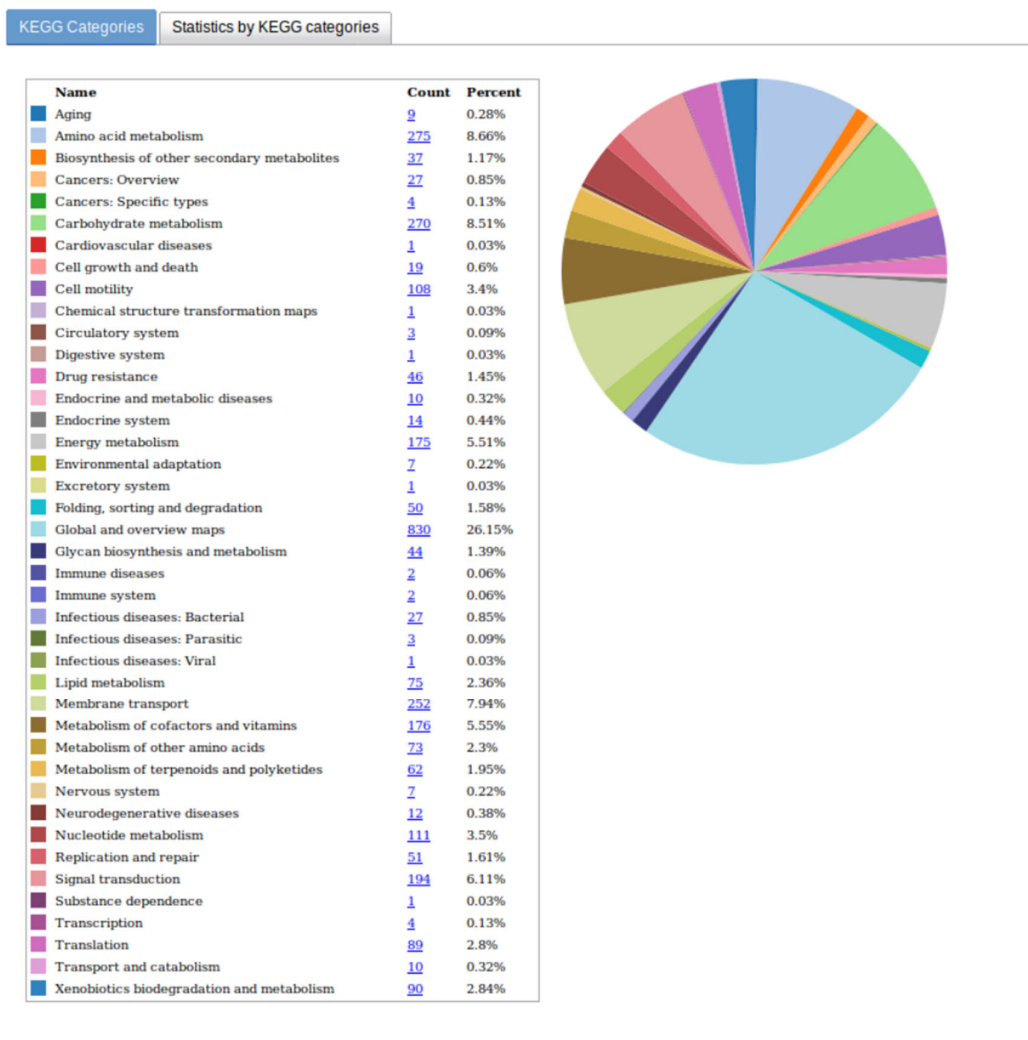

**Figure S2.** Genes (number and percentage) in the CS51 genome related to KEGG categories.

**Table S1.** Genomic comparison of *P. psychrotolerans* CS51 with related species.

| Annotation statistics  | <i>P. psychrotolerans</i> CS51 | <i>P. psychrotolerans</i> PRSO8 | <i>P. aeruginosa</i> | <i>P. putida</i> | <i>P.syringae</i> pv. <i>Syringae</i> |
|------------------------|--------------------------------|---------------------------------|----------------------|------------------|---------------------------------------|
| Genome size (bp)       | 5,364,174                      | 5,271,920                       | 6,317,050            | 6,181,873        | 6,093,698                             |
| GC (%)                 | 64.71                          | 64.8                            | 66.5                 | 61.5             | 59.2                                  |
| Total number of genes  | 4,859                          | 4,753                           | 5,980                | 5,786            | 5,220                                 |
| Number of CDSs         | 4,771                          | 4,657                           | 5,980                | 5,564            | 5,089                                 |
| Pseudogenes            | 88                             | NA                              | 54                   | NA               | NA                                    |
| RNA                    | 88                             | 96                              | 80                   | 22               | 16                                    |
| rRNA (5 S, 16 S, 23 S) | 5, 5, 5                        | 5,5,5                           | 4, 4, 4,             | NA               | NA                                    |
| rRNA genes             | 15                             | 15                              | 12                   | NA               | NA                                    |
| tRNA genes             | 67                             | 68                              | 64                   | 75               | 64                                    |
